# Supplementary material for: Effects of sublethal doses of thiacloprid and its formulation Calypso® on the learning and memory performance of honey bees
Source: Oxford University Press journal article supplement (doi:10.1242/jeb.154518), 2017-01-01
Supplement: jeb154518supp.pdf [file jeb154518supp.pdf]

### Supporting Information

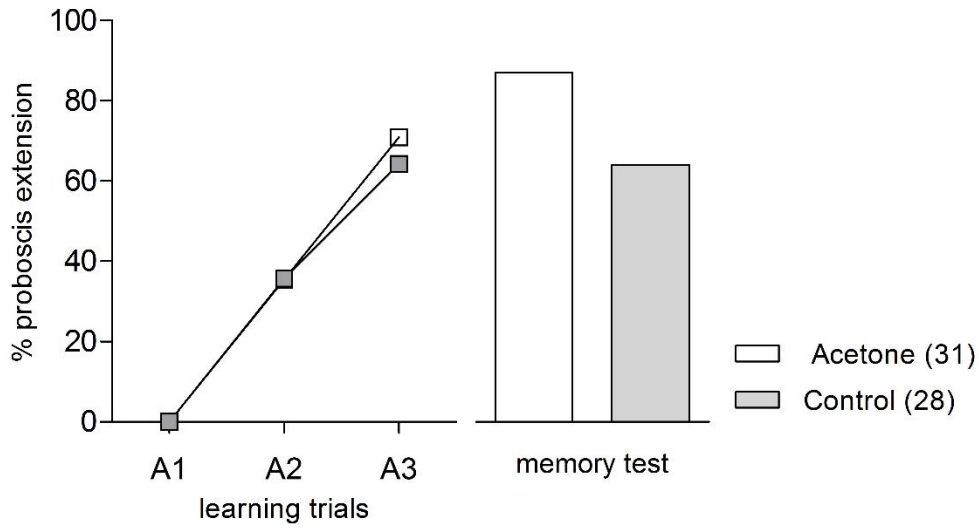

**Figure S1. Memory retrieval after treatment with 0.5 % acetone.** Retention score was determined 24 h after acquisition and 19 hours after treatment with 0.5 % acetone in sucrose solution. No difference was found between the two groups (Fischer exact test,  $P = 0.064$ ). The number of individuals in each group is given in brackets in the legend.

**Table S1. Mortality and response to the US test of bees intoxicated with thiacloprid or Calypso**

| treatment          | % of bees dead after intoxic | significance (Chi square)             | % of bees not responsive to US test (alive bees only) | significance (Chi square)                         |
|--------------------|------------------------------|---------------------------------------|-------------------------------------------------------|---------------------------------------------------|
| control            | 0.45                         | $\chi^2 = 1.009, df = 1,$<br>P = 0.32 | 4.52                                                  | $\chi^2 = 1.53, df = 1,$<br>P = 0.22              |
| thiacloprid 69 ng  | 1.35                         |                                       | 7.31                                                  |                                                   |
| control            | 3.10                         | $\chi^2 = 2.338, df = 3,$<br>P = 0.51 | 0.80                                                  | $\chi^2 = 1.517, df = 3,$<br>P = 0.68             |
| Calypso® 120 ng    | 0.00                         |                                       | 0.00                                                  |                                                   |
| Calypso® 12 ng     | 1.56                         |                                       | 0.00                                                  |                                                   |
| Calypso® 1.2 ng    | 3.17                         |                                       | 0.00                                                  |                                                   |
| control            | 4.26                         | $\chi^2 = 4.196, df = 3,$<br>P = 0.24 | 16.11                                                 | $\chi^2 = 12.93, df = 3,$<br><b>P &lt; 0.01</b>   |
| thiacloprid 200 ng | 2.23                         |                                       | 8.00                                                  |                                                   |
| thiacloprid 20 ng  | 3.70                         |                                       | 6.04                                                  |                                                   |
| thiacloprid 2 ng   | 1.08                         |                                       | 7.65                                                  |                                                   |
| control            | 3.16                         | $\chi^2 = 7.63, df = 3,$<br>P = 0.054 | 5.88                                                  | $\chi^2 = 35.21, df = 3,$<br><b>P &lt; 0.0001</b> |
| Calypso® 200 ng    | 1.70                         |                                       | 24.86                                                 |                                                   |
| Calypso® 20 ng     | 4.05                         |                                       | 10.84                                                 |                                                   |
| Calypso® 2 ng      | 0.00                         |                                       | 7.34                                                  |                                                   |

Significant p-values (< 0.05) are showed in bold letters.

**Table S2. Pesticide residues analysis of honey bees exposed to thiacloprid, as active substance and formulation**

| sample            | sample weight (mg) *<br>n= 30 | thiacloprid residues (ng/g)<br>corrected by thiacloprid-d4 recoveries |        |         |            |               | thiacloprid-d4 recoveries (%) |        |         |    |
|-------------------|-------------------------------|-----------------------------------------------------------------------|--------|---------|------------|---------------|-------------------------------|--------|---------|----|
|                   |                               | head                                                                  | thorax | abdomen | whole body | whole body    | head                          | thorax | abdomen |    |
| <b>200 ng/bee</b> |                               |                                                                       |        |         |            |               |                               |        |         |    |
| thiacloprid       | I                             | 3181.4                                                                | 241.9  | 12.9    | 164.5      | <b>419.4</b>  | <b>12.5</b>                   | 89     | 74      | 75 |
|                   | II                            | 3131.5                                                                | 493.9  | 110.5   | 174.1      | <b>778.5</b>  | <b>18.8</b>                   | 78     | 69      | 66 |
|                   | III                           | 3352.3                                                                | 2957.5 | 302.8   | 477.8      | <b>3738.1</b> | <b>72.5</b>                   | 73     | 85      | 69 |
| Calypso®          | I                             | 3407.1                                                                | 309.8  | 92.5    | 270.4      | <b>672.6</b>  | <b>23.9</b>                   | 77     | 69      | 64 |
|                   | II                            | 3284.2                                                                | 520.0  | 105.0   | 510.0      | <b>1135.0</b> | <b>39.4</b>                   | 83     | 68      | 52 |
|                   | III                           | 3148.0                                                                | 2667.6 | 362.5   | 751.5      | <b>3781.6</b> | <b>84.0</b>                   | 83     | 67      | 72 |
| <b>20 ng/bee</b>  |                               |                                                                       |        |         |            |               |                               |        |         |    |
| thiacloprid       | I                             | 3086.3                                                                | 16.7   | 5.0     | 9.1        | <b>30.8</b>   | <b>0.9</b>                    | 70     | 57      | 58 |
|                   | II                            | 3222.1                                                                | 19.1   | 3.1     | 5.0        | <b>27.2</b>   | <b>0.6</b>                    | 62     | 51      | 64 |
|                   | III                           | 3256.0                                                                | 159.6  | 25.8    | 49.8       | <b>235.1</b>  | <b>5.5</b>                    | 70     | 55      | 54 |
| Calypso®          | I                             | 3208.0                                                                | 16.9   | 9.3     | 14.1       | <b>40.3</b>   | <b>1.3</b>                    | 74     | 76      | 64 |
|                   | II                            | 2999.0                                                                | 12.8   | 6.2     | 17.8       | <b>36.8</b>   | <b>1.3</b>                    | 73     | 57      | 77 |
|                   | III                           | 3259.0                                                                | 388.7  | 55.1    | 67.2       | <b>511.1</b>  | <b>10.2</b>                   | 78     | 67      | 63 |
| <b>2 ng/bee</b>   |                               |                                                                       |        |         |            |               |                               |        |         |    |
| thiacloprid       | I                             | 3231.6                                                                | 11.1   | 3.7     | 4.1        | <b>18.9</b>   | <b>0.5</b>                    | 76     | 63      | 63 |
|                   | II                            | 3199.1                                                                | 9.5    | 2.8     | 6.3        | <b>18.7</b>   | <b>0.6</b>                    | 64     | 63      | 62 |
|                   | III                           | 2908.6                                                                | 46.1   | 9.5     | 12.3       | <b>67.9</b>   | <b>1.3</b>                    | 68     | 63      | 53 |
| Calypso®          | I                             | 3110.1                                                                | 16.4   | 20.5    | 3.9        | <b>40.8</b>   | <b>1.2</b>                    | 92     | 72      | 72 |
|                   | II                            | 3223.0                                                                | 7.5    | 2.7     | 1.6        | <b>11.8</b>   | <b>0.3</b>                    | 82     | 37      | 81 |
|                   | III                           | 3149.3                                                                | 15.9   | 3.9     | 4.2        | <b>23.9</b>   | <b>0.5</b>                    | 76     | 75      | 66 |
| control           | I                             | 2961.6                                                                | 13.7   | 3.2     | 2.4        | <b>19.4</b>   | <b>0.4</b>                    | 77     | 69      | 69 |
|                   | II                            | 3071.4                                                                | 6.3    | 3.1     | 8.1        | <b>17.5</b>   | <b>0.6</b>                    | 71     | 70      | 55 |
|                   | III                           | 3159.5                                                                | 7.3    | 3.1     | 0.5        | <b>10.9</b>   | <b>0.2</b>                    | 68     | 59      | 86 |
| <b>LOD §</b>      |                               |                                                                       | 0.2    | 0.05    | 0.04       |               |                               |        |         |    |
| <b>LOQ §</b>      |                               |                                                                       | 0.4    | 0.1     | 0.07       |               |                               |        |         |    |

\* The sample weight is the sum of the weights of the separated analyzed honeybee body parts.

§ LOD, limit of detection (3 times background noise); LOQ, limit of quantification (10 times background noise). The calculation is based on an average weight of 30 bee body parts each.
